# Supplementary material for: Palygorskite@Fe3O4@polyperfluoroalkylsilane nanocomposites for superoleophobic coatings and magnetic liquid marbles
Source: Royal Society of Chemistry journal article supplement (doi:10.1039/c6ta00758a), 2016-01-01
Supplement: c6ta00758a5.pdf [file c6ta00758a5.pdf]

## Supporting Information

### Palygorskite@Fe<sub>3</sub>O<sub>4</sub>@polyperfluoroalkylsilane nanocomposites for superoleophobic coatings and magnetic liquid marbles

Lingxiao Li,<sup>ab</sup> Bucheng Li,<sup>a</sup> Ling Fan,<sup>a</sup> Bin Mu,<sup>a</sup> Aiqin Wang,<sup>a</sup> and Junping Zhang<sup>\*a</sup>

<sup>a</sup> Center of Eco-material and Green Chemistry, and State Key Laboratory for Oxo Synthesis & Selective Oxidation, Lanzhou Institute of Chemical Physics, Chinese Academy of Sciences, Lanzhou 730000, P. R. China

<sup>b</sup> Graduate University of the Chinese Academy of Sciences, Beijing, 100049, P. R. China

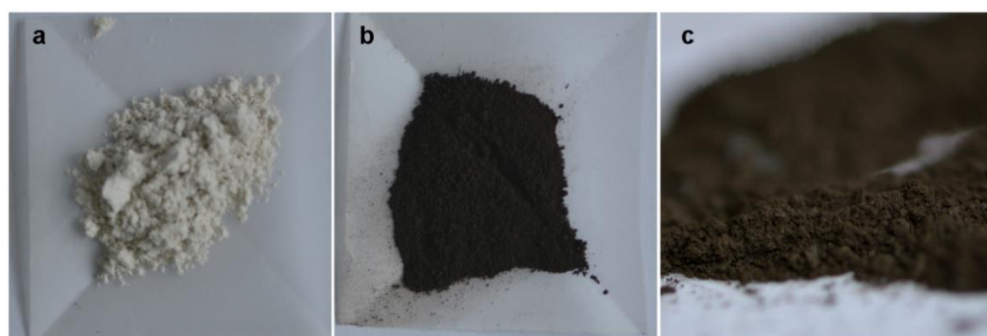

**Figure S1.** Digital images of (a) PAL, (b) PAL@Fe<sub>3</sub>O<sub>4</sub> and (c) PAL@Fe<sub>3</sub>O<sub>4</sub>@fluoroPOS<sub>4.0</sub>.

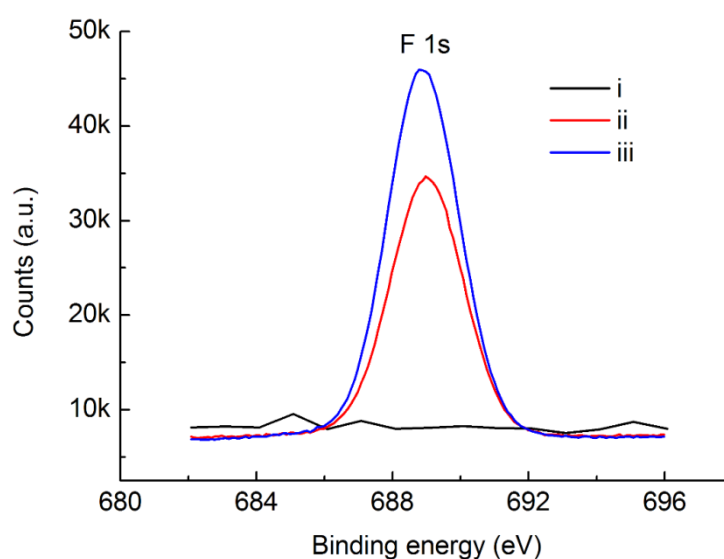

**Figure S2.** High-resolution F 1s spectra of (i) PAL@Fe<sub>3</sub>O<sub>4</sub>, (ii) PAL@Fe<sub>3</sub>O<sub>4</sub>@fluoroPOS<sub>0.25</sub> and (iii) PAL@Fe<sub>3</sub>O<sub>4</sub>@fluoroPOS<sub>4.0</sub>.

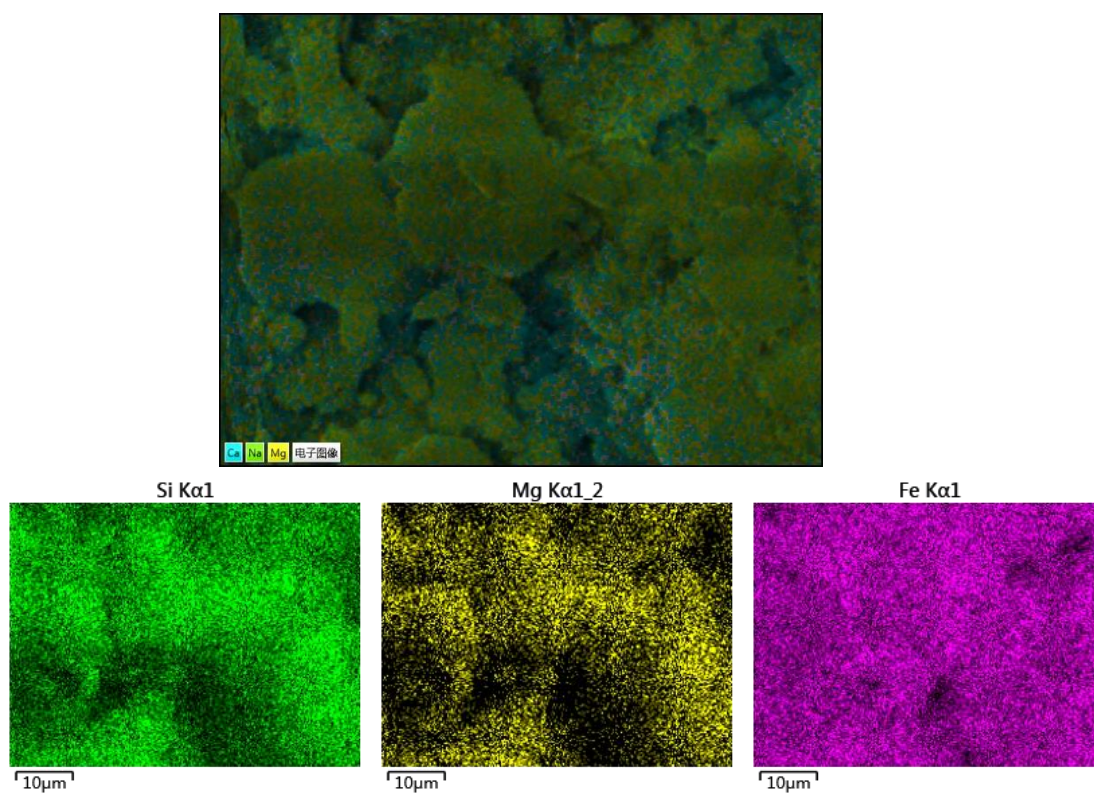

(a)

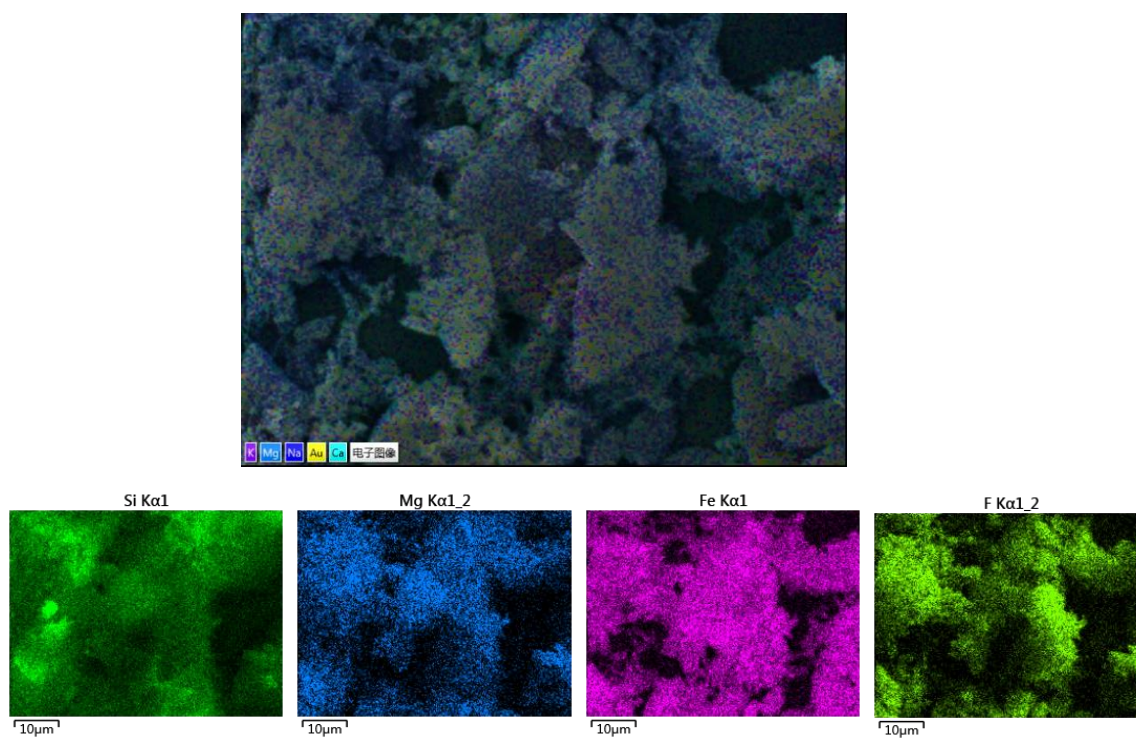

(b)

**Figure S3.** EDS elemental maps of (a) Si, Mg and Fe in PAL@Fe<sub>3</sub>O<sub>4</sub> and (b) Si, Mg, Fe and F in PAL@Fe<sub>3</sub>O<sub>4</sub>@fluoroPOS<sub>4.0</sub>.

**Movie S1.** Slide of various liquid droplets off the  $10^\circ$  tilted PAL@Fe<sub>3</sub>O<sub>4</sub>@fluoroPOS<sub>4.0</sub> coated glass slide.

**Movie S2.** Remote control of the liquid marbles using a magnet on solid surface and water surface.

**Movie S3.** Rapid movement of the liquid marbles on a piece of paper.

**Movie S4.** Ejection of the liquid marbles using forceps and playing the liquid marbles freely using a spoon on paper like playing "mini-golf".
